# Supplementary material for: Factors influencing uncertainties of in vivo bone lead measurement using a109Cd K X-ray fluorescence clover leaf geometry detector system
Source: Royal Society of Chemistry journal article supplement (doi:10.1039/c4em00446a), 2014-10-16
Supplement: c4em00446a1.pdf [file c4em00446a1.pdf]

**Supplemental Table 1: Summary statistics of bone lead levels of EG, corresponding uncertainty, and demographic variables age and BMI**

| Variable            | N   | Median | Min    | Max    | Geometric Mean     | 95% CI             |                    |
|---------------------|-----|--------|--------|--------|--------------------|--------------------|--------------------|
|                     |     |        |        |        |                    | Lower              | Upper              |
| Cal Pb              | 263 | 5.34   | -10.70 | 287.03 | 9.40 <sup>1</sup>  | 6.68 <sup>1</sup>  | 12.13 <sup>1</sup> |
| Cal Un <sup>3</sup> | 263 | 4.86   | 2.97   | 66.94  | 5.16               | 4.95               | 5.38               |
| Ti Pb               | 263 | 2.85   | -18.93 | 19.49  | 2.72 <sup>1</sup>  | 1.95 <sup>1</sup>  | 3.49 <sup>1</sup>  |
| Ti Un <sup>3</sup>  | 263 | 4.06   | 1.88   | 34.18  | 4.39               | 4.17               | 4.62               |
| Age                 | 263 | 33.12  | 1.31   | 83.75  | 32.98 <sup>2</sup> | 30.48 <sup>2</sup> | 35.48 <sup>2</sup> |
| BMI                 | 237 | 23.29  | 10.40  | 85.01  | 23.63 <sup>2</sup> | 22.75 <sup>2</sup> | 24.51 <sup>2</sup> |

<sup>1</sup> For Tibia (Ti) and Calcaneus (Cal) Pb levels the arithmetic mean was reported in place of the geometric mean due to negative values. Ti lead was normally distributed therefore no transformation was required. When Cal lead was used in the analysis then the transformation  $\log(x+11)$  was used to normalize the data.

<sup>2</sup> Arithmetic means and corresponding confidence intervals were reported for age and body mass index (BMI)

<sup>3</sup> "Un" Stands for uncertainty values, and Pb for lead levels

**Supplemental Table 2: Summary statistics of bone lead levels of Smelter Employees, corresponding uncertainty, and demographic variable age**

| Variable | N   | Median | Min   | Max    | Geometric Mean     | 95% CI             |                    |
|----------|-----|--------|-------|--------|--------------------|--------------------|--------------------|
|          |     |        |       |        |                    | Lower              | Upper              |
| Cal Pb   | 497 | 19.69  | -4.92 | 180.05 | 30.08 <sup>1</sup> | 27.66 <sup>1</sup> | 32.50 <sup>1</sup> |
| Cal Un   | 497 | 2.40   | 0.880 | 4.62   | 2.72               | 2.67               | 2.77               |
| Ti Pb    | 497 | 13.08  | -6.12 | 100.18 | 19.90 <sup>1</sup> | 18.28 <sup>1</sup> | 21.52 <sup>1</sup> |
| Ti Un    | 497 | 1.57   | 0.640 | 5.29   | 2.735              | 2.30               | 2.40               |
| Age      | 497 | 50.10  | 21.21 | 85.00  | 47.65 <sup>2</sup> | 46.80 <sup>2</sup> | 48.50 <sup>2</sup> |

<sup>1</sup> For Tibia (Ti) and Calcaneus (Cal) Pb levels, the arithmetic mean was reported in place of the geometric mean due to negative values. Ti lead and Cal lead were not normally distributed; therefore, the transformation  $\log(x+7)$  was used to normalize the data.

<sup>2</sup> Arithmetic means and corresponding confidence intervals were reported for age

**Supplemental Table 3: Two way ANOVA results for calcaneus and tibia uncertainties for demographic variables BMI by Sex (with children <11 removed)**

| Analyte (units) | Demographic Variable     | N               | p-value <sup>1</sup>       | GM (95%CI) <sup>2</sup> |                   |
|-----------------|--------------------------|-----------------|----------------------------|-------------------------|-------------------|
| Calcaneus       | Sex                      |                 | 0.4249 <sup>a</sup>        |                         |                   |
|                 | BMI                      |                 | <b>0.0069</b> <sup>a</sup> |                         |                   |
|                 | Sex*BMI                  |                 | 0.5818 <sup>a</sup>        |                         |                   |
|                 | <sup>3</sup> Males:BMI   | BMI <18.5       | 5                          |                         | 4.93 (3.96, 6.13) |
|                 |                          | 18.5 ≤ BMI < 25 | 41                         |                         | 4.52 (4.19, 4.88) |
|                 |                          | 25 ≤ BMI < 30   | 37                         |                         | 4.95 (4.57, 5.37) |
|                 |                          | BMI ≥ 30        | 11                         |                         | 5.27 (4.55, 6.11) |
|                 | <sup>3</sup> Females:BMI | BMI <18.5       | 10                         |                         | 4.45 (3.81, 5.19) |
|                 |                          | 18.5 ≤ BMI < 25 | 50                         |                         | 4.54 (4.24, 4.87) |
|                 |                          | 25 ≤ BMI < 30   | 28                         |                         | 4.62 (4.21, 5.07) |
| BMI ≥ 30        |                          | 13              | 5.56 (4.85, 6.36)          |                         |                   |
| Tibia           | Sex                      |                 | 0.0077                     |                         |                   |
|                 | BMI                      |                 | <b>0.0163</b>              |                         |                   |
|                 | Sex*BMI                  |                 | 0.6724                     |                         |                   |
|                 | <sup>3</sup> Males:BMI   | BMI <18.5       | 5                          |                         | 4.42 (3.17, 6.17) |
|                 |                          | 18.5 ≤ BMI < 25 | 41                         |                         | 3.39 (3.01, 3.80) |
|                 |                          | 25 ≤ BMI < 30   | 37                         |                         | 3.97 (3.52, 4.49) |
|                 |                          | BMI ≥ 30        | 11                         |                         | 3.68 (2.94, 4.61) |
|                 | <sup>3</sup> Females:BMI | BMI <18.5       | 10                         |                         | 4.47 (3.53, 5.66) |
|                 |                          | 18.5 ≤ BMI < 25 | 50                         |                         | 4.14 (3.73, 4.60) |
|                 |                          | 25 ≤ BMI < 30   | 28                         |                         | 5.17 (4.49, 5.95) |
| BMI ≥ 30        |                          | 13              | 4.96 (4.03, 6.10)          |                         |                   |

<sup>1</sup> p-value for overall group effect

<sup>2</sup> Geometric Mean (GM) and corresponding 95% confidence interval (CI): the 95% CI for the geometric mean were corrected for multiple comparisons using Tukey correction

<sup>3</sup>Analysis includes those who are 11 years of age and older  
<sup>a</sup> the analysis is based on the non-parametric two way ANOVA model

**Table 4: Simultaneous regression models relating age or BMI, and lead levels to uncertainty levels for each sex**

| Effect                                                                                                   | Males<br>PE (SE) <sup>1</sup> | Females<br>PE (SE) <sup>1</sup> | Coincidence $a_1=b_1=c_1=0$ | p-value for equal Effect <sup>2</sup> |
|----------------------------------------------------------------------------------------------------------|-------------------------------|---------------------------------|-----------------------------|---------------------------------------|
| <b>Dependent Variable: Tibia Uncertainty</b> , Adjusted R <sup>2</sup> =9.2%                             |                               |                                 |                             |                                       |
| Intercept                                                                                                | 1.36 (0.04)****               | 1.58 (0.04)****                 | < 0.0001                    | 0.0006                                |
| Age                                                                                                      | -0.01 (0.00)****              | 0.00 (0.00)                     |                             | 0.0030                                |
| Lead <sup>3</sup>                                                                                        | 0.01 (0.01)                   | -0.01 (0.01)*                   |                             | 0.0237                                |
| <b>Dependent Variable: Tibia Uncertainty</b> , Adjusted R <sup>2</sup> =8.4%, including only age≥11      |                               |                                 |                             |                                       |
| Intercept                                                                                                | 1.28 (0.05)****               | 1.56 (0.04)****                 | 0.0001                      | <0.0001                               |
| Age                                                                                                      | 0.00 (0.00)                   | 0.00 (0.00)                     |                             | 0.1506                                |
| Lead <sup>3</sup>                                                                                        | 0.01 (0.01)                   | -0.01 (0.01)*                   |                             | 0.1359                                |
| <b>Dependent Variable: Calcaneus Uncertainty</b> , Adjusted R <sup>2</sup> =29.4%                        |                               |                                 |                             |                                       |
| Intercept                                                                                                | 0.98 (0.09)****               | 1.18 (0.09)****                 | 0.0697                      |                                       |
| Age                                                                                                      | -0.01 (0.00)****              | -0.00 (0.00)**                  |                             |                                       |
| Lead <sup>3</sup>                                                                                        | 0.25 (0.03)****               | 0.16 (0.03)****                 |                             |                                       |
| <b>Dependent Variable: Calcaneus Uncertainty</b> , Adjusted R <sup>2</sup> =15.5%, including only age≥11 |                               |                                 |                             |                                       |
| Intercept                                                                                                | 1.18 (0.08)****               | 1.25 (0.08)****                 | 0.5182                      |                                       |
| Age                                                                                                      | 0.00 (0.00)                   | 0.00 (0.00)                     |                             |                                       |
| Lead <sup>3</sup>                                                                                        | 0.15 (0.03)****               | 0.11 (0.03)***                  |                             |                                       |
| <b>Dependent Variable: Tibia Uncertainty</b> , Adjusted R <sup>2</sup> =7.20%, including only age≥11     |                               |                                 |                             |                                       |
| Intercept                                                                                                | 1.29 (0.05)****               | 1.54 (0.04)****                 | 0.0014                      | <0.0001                               |
| BMI                                                                                                      | 0.00 (0.01)                   | 0.01 (0.00)                     |                             | 1.0000                                |
| Lead <sup>3</sup>                                                                                        | 0.00 (0.01)                   | -0.01 (0.01)                    |                             | 0.4557                                |
| <b>Dependent Variable: Calcaneus Uncertainty</b> , Adjusted R <sup>2</sup> =18.2%, including only age≥11 |                               |                                 |                             |                                       |
| Intercept                                                                                                | 1.19 (0.08)****               | 1.22 (0.09)****                 | 0.6482                      |                                       |
| BMI                                                                                                      | 0.01 (0.01)*                  | 0.01 (0.00)*                    |                             |                                       |
| Lead <sup>3</sup>                                                                                        | 0.14 (0.03)****               | 0.12 (0.03)****                 |                             |                                       |

<sup>1</sup>PE=Parameter Estimate, SE=Standard Error of the parameter estimate

<sup>2</sup>If the test of coincidence is rejected, i.e., the two lines do not coincide, then test for equal intercept and/or equal slopes are carried out, otherwise no further tests are carried out. Bonferroni corrections were applied for multiple tests on the same data set.

<sup>3</sup>Tibia lead levels used in Tibia uncertainty models were not log transformed as they were normally distributed. Calcaneus lead levels used in Calcaneus uncertainty models were transformed using log(x+11) to satisfy the normality assumption.

Significance of parameter estimates is as follows: \* p<0.05, \*\* p<0.01, \*\*\* p<0.001, \*\*\*\* p<0.0001
